# Supplementary material for: Next-Generation Proteomics–Based Discovery, Verification, and Validation of Urine Biomarkers for Bladder Cancer Diagnosis
Source: PubMed Central journal article supplement — Cancer Res Treat. 2021 Oct 9;54(3):882–93. doi: 10.4143/crt.2021.642 (PMC9296925; doi:10.4143/crt.2021.642), 2021-10-09
Supplement: crt-2021-642_S3_Fig.pdf [file crt-2021-642_S3_Fig.pdf]

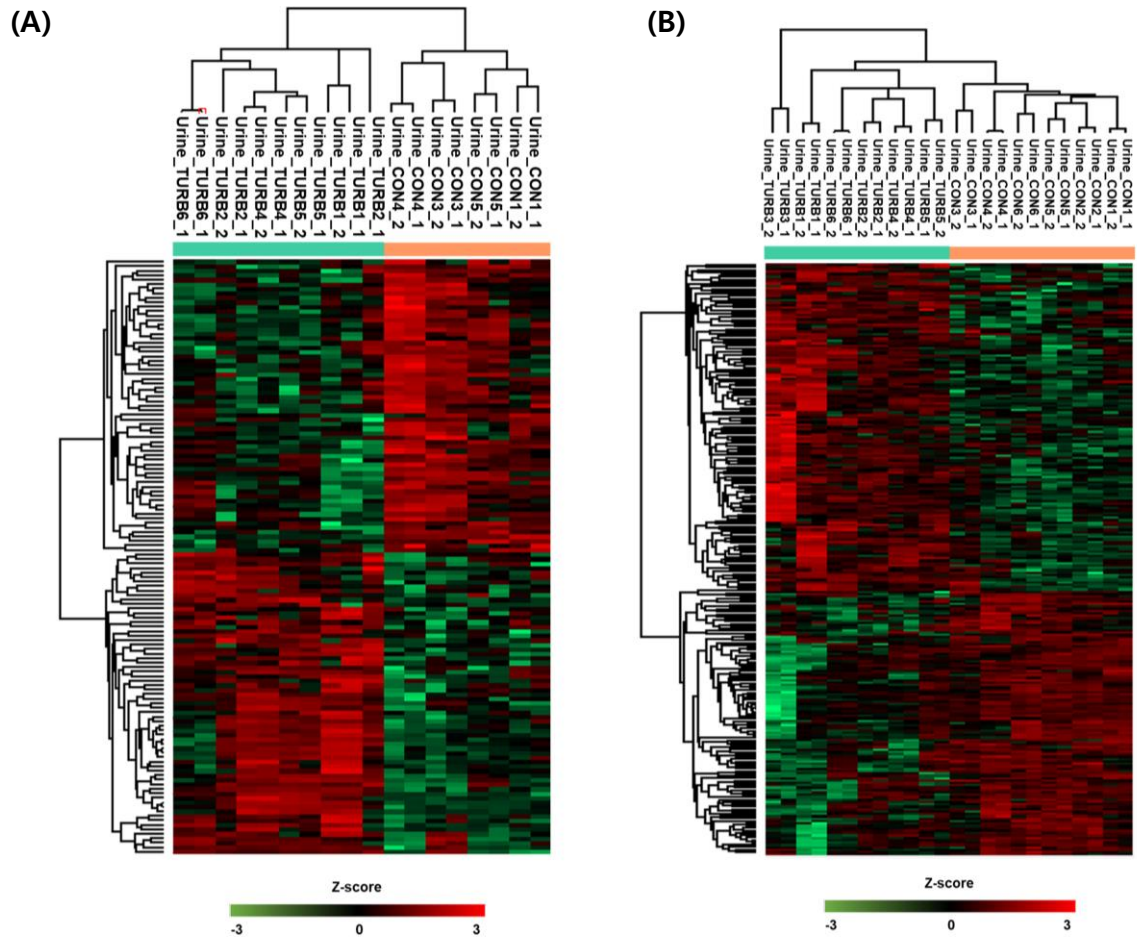

**S3 Fig.** Heat-map of urinary exosome differentially expressed proteins (DEPs) (A) and urine DEPs (B) in discovery cohort.
