# Supplementary material for: Next-Generation Proteomics–Based Discovery, Verification, and Validation of Urine Biomarkers for Bladder Cancer Diagnosis
Source: PubMed Central journal article supplement — Cancer Res Treat. 2021 Oct 9;54(3):882–93. doi: 10.4143/crt.2021.642 (PMC9296925; doi:10.4143/crt.2021.642), 2021-10-09
Supplement: crt-2021-642_S6_Fig.pdf [file crt-2021-642_S6_Fig.pdf]

(A)

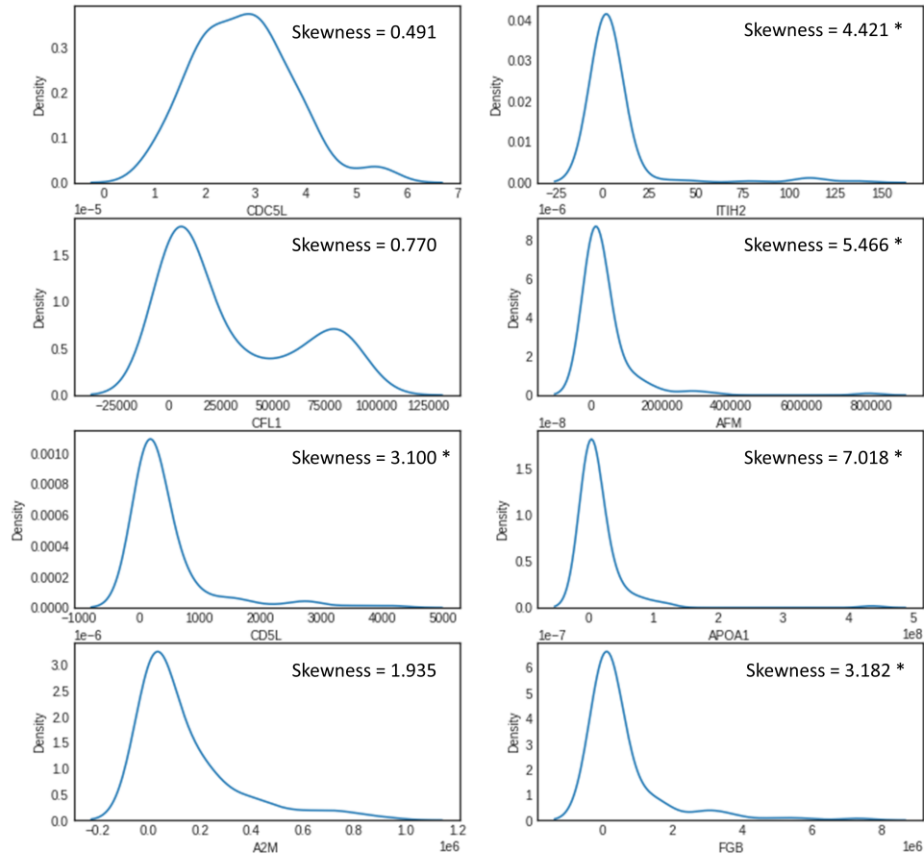

(B)

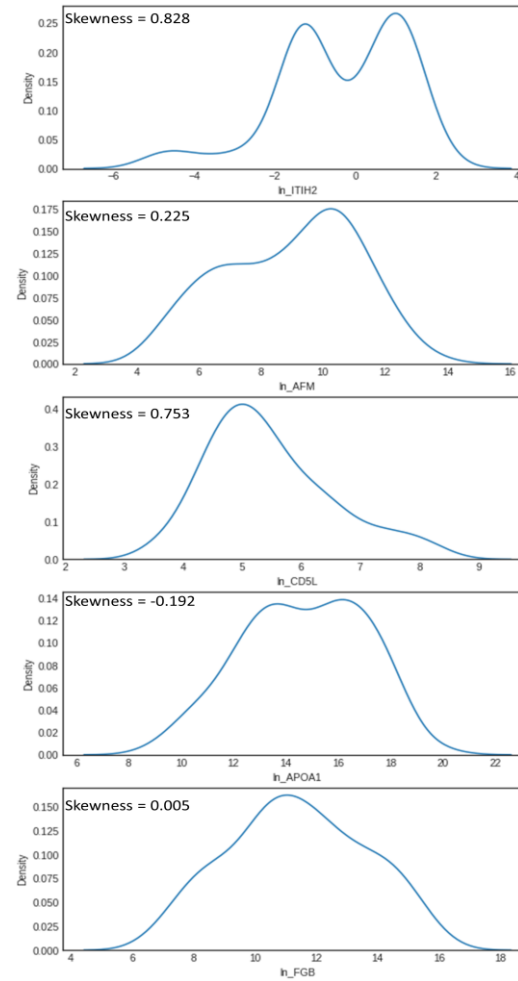

**S6 Fig.** (A) Skewness of the protein expression data in enzyme-linked immunosorbent assay study. Asteroid marked figure presenting skewed data. (B) Skewness after nature logarithmic transformation for skewed protein expression in raw data, ITIH2, AFM, hCD5L, APOA1, and FGA.
